# Antagonistic Effects of Testosterone and the Endocrine Disruptor Mono-(2-Ethylhexyl) Phthalate on *INSL3* Transcription in Leydig Cells

Éric Laguë and Jacques J. Tremblay

Department of Reproduction, Perinatal, and Child Health (E.L., J.J.T.), Centre Hospitalier Universitaire of Québec Research Centre, Québec City, Québec, Canada G1V 4G2; Centre for Research in Biology of Reproduction (J.J.T.), Department of Obstetrics and Gynecology, Faculty of Medicine, Université Laval, Québec City, Québec, Canada G1V 0A6

**Insulin-like 3 (INSL3) is a small peptide produced by testicular Leydig cells throughout embryonic and postnatal life and by theca and luteal cells of the adult ovary. During fetal life, INSL3 regulates testicular descent in males, whereas in adults, it acts as an antiapoptotic factor for germ cells in males and as a follicle selection and survival factor in females. Despite its considerable roles in the reproductive system, the mechanisms that regulate *Insl3* expression remain poorly understood. There is accumulating evidence suggesting that androgens might regulate *Insl3* expression in Leydig cells, but transcriptional data are still lacking. We now report that testosterone does increase *Insl3* mRNA levels in a Leydig cell line and primary Leydig cells. We also show that testosterone activates the activity of the *Insl3* promoter from different spe-**

**cies. In addition, the testosterone-stimulating effects on *Insl3* mRNA levels and promoter activity require the androgen receptor. We have mapped the testosterone-responsive element to the proximal *Insl3* promoter region. This region, however, lacks a consensus androgen response element, suggesting an indirect mechanism of action. Finally we show that mono-(2-ethylhexyl) phthalate, a widely distributed endocrine disruptor with antiandrogenic activity previously shown to inhibit *Insl3* expression *in vivo*, represses *Insl3* transcription, at least in part, by antagonizing testosterone/androgen receptor action. All together our data provide important new insights into the regulation of *Insl3* transcription in Leydig cells and the mode of action of phthalates. (Endocrinology 149: 4688–4694, 2008)**

**I**NSULIN-LIKE 3 (INSL3), ALSO known as relaxin-like factor, is a member of the insulin-IGF-relaxin family of growth factors and hormones (1, 2). This hormone is almost exclusively expressed in the gonads. During fetal life, INSL3 is produced by maturing Leydig cells of the male gonad, whereas in adults it is secreted by both the testis (Leydig cells) and the ovary (theca and luteal cells) (1–4). Consistent with its sexually dimorphic expression pattern during fetal life, INSL3 was found to be a master regulator of gonadal descent, an essential step of the male sex differentiation process. *Insl3*<sup>-/-</sup> null mice have bilateral cryptorchid testes located high in the abdominal cavity close to the kidneys (5, 6). Further support for INSL3 as a regulator of testicular descent came from elegant transgenic experiments in which INSL3 was overexpressed in pancreatic  $\beta$ -cells of *Insl3* null mice (7). In these animals, normal testis descent was restored. Even more convincing was the generation of female transgenic mice overexpressing INSL3, which led to descended ovaries (7, 8). In adults, INSL3 acts as a germ cell survival factor (9) and would also be involved in follicle selection and survival (10, 11).

Despite its important roles in reproductive development and function, surprisingly very little is known regarding the

mechanisms regulating *Insl3* expression in gonadal cells. At the molecular level, so far only two transcription factors have been shown to regulate *INSL3* promoter activity in Leydig cells: the nuclear receptors steroidogenic factor-1 (SF1; Ad4BP/NR5A1) and NUR77 (NGFI-B/NR4A1) (12–16). At the hormonal level, *Insl3* expression was found to require the pituitary LH in postnatal Leydig cells (3, 9, 17). This, however, is believed to be associated with the differentiation status of Leydig cells, which is dependent on LH, rather than the result of an acute response to LH as for steroidogenesis (3, 18). In addition to LH, there is mounting evidence that *Insl3* expression would be regulated by androgens in several species. In testicular feminized mice, which harbor a mutation in the androgen receptor (AR) gene causing complete androgen insensitivity (19–21), *Insl3* expression is severely decreased (22). In an AR hypomorphic mice model in which AR levels are reduced (23), *Insl3* expression was down-regulated nearly 10-fold (24). In these mice, LH and testosterone levels were dramatically increased, consistent with normally differentiated and functioning pituitary gonadotrope and testicular Leydig cells (24). In adult rats, GnRH antagonists (chemical castration) down-regulate *Insl3* expression (9). Treatment with human chorionic gonadotropin restored *Insl3* mRNA levels in GnRH antagonist-treated animals (9) and *hpg* mice (3), which have a deletion of the *Gnrh1* gene (25, 26). In humans, INSL3 and testosterone concentrations are significantly correlated (17, 18). Finally, endocrine disruptors exhibiting antiandrogenic activity, such as the widely distributed plasticizer phthalate, repress *Insl3* expression in Leydig cells (27–29). The exact mechanisms of action of an-

First Published Online May 22, 2008

Abbreviations: AR, Androgen receptor; DEHP, di-2-ethylhexyl phthalate; INSL3, insulin-like 3; MEHP, mono-(2-ethylhexyl) phthalate; PPAR, peroxisome proliferator-activated receptor; SF1, steroidogenic factor-1.

*Endocrinology* is published monthly by The Endocrine Society (<http://www.endo-society.org>), the foremost professional society serving the endocrine community.

drogens on *Insl3* expression, however, remain completely obscure.

In the present study, we provide evidence that testosterone regulates *Insl3* transcription in Leydig cells in an AR-dependent manner. We have also mapped an androgen-responsive region in the human *INSL3* promoter. Finally, we found that mono-(2-ethylhexyl) phthalate (MEHP) represses *Insl3* transcription, at least in part, by antagonizing the testosterone stimulating effects.

## Materials and Methods

### Plasmids

The -1137-, -920-, and -656- to +11-bp human *INSL3* promoter fragment have been previously described (15). Additional deletion constructs to -132 and -85 bp were generated by PCR using the -1137-bp construct as template along with a common reverse primer containing a *KpnI* cloning site (underlined) 5'-GGG GTA CCG GTG GGT GGC GCC GGG GCC AAG C-3' and the following forward primers that contain *Bam*HI cloning sites (underlined): -132 bp, 5'-CGG GAT CCC AGA AAG GCT CTG GCA C-3' and -85 bp, 5'-CGG GAT CCT GAA GAA TGT TCT G-3'. The -31- to +11-bp reporter construct was obtained by subcloning a double-stranded oligonucleotide: sense oligo 5'-CGG TGG GTG GCG CCG GGG CCA AGC GGG GAC CCC CTT TAT AGG CG-3' and antisense 5'-GAT CCG CCT ATA AAG GGG GAC CCC GCT TGG CCC CGG CGC CAC CCA CCG GTA C-3'.

Various trinucleotide mutant constructs in the context of the -1137- and -132-bp reporters were generated using the QuikChange XL mutagenesis kit (Stratagene, La Jolla, CA) along with the following oligonucleotides (only the sense oligonucleotide is shown) in which the

mutations are in *lowercase*: M1, 5'-AAG GCC CTG GCC CTG GCC CTG GAA tcc AGG CTC CTC TGG CAC TAA CCC C-3'; M2, 5'-CCC TGG CCC TGG GAG AAA tta TCT GGC ACT AAC CCC ACC C-3'; M3, GCC CTG GGA GAA AGG CTa gtG CAC TAA CCC CAC CCT TGA C-3'; M4, 5'-CCT GGG AGA AAG GCT CTG Gac aTA ACC CCA CCC TTG ACC-3'; M5, 5'-AAG GCT CTG GCA CTA ACC aac CCC TTG ACC TTT TTC CTG GGC G-3'; M6, 5'-CTC TGG CAC TAA CCC CAC aag TGA CCT TTT TCC TGG GCG-3'; M7, 5'-GGC ACT AAC CCC ACC TTt caC TTT TTC CTG GGC GGT CC-3'; M8, 5'-CTA ACC CCA CCC TGA CCg ggT TCC TGG GCG GGT CCT GAA G-3'; M9, 5'-CCC CAC CCT GAC CTT TTg aaT GGG CGG GTC CTG AAG AAT G-3'; M10, 5'-CCA CCC TGA CCT TTT TCC Tt tCG GGT CCT GAA GAA TGT TCT GTC C-3'. The -978- to +5-bp mouse *Insl3* promoter fragment was isolated by PCR using mouse genomic DNA and the following primers: forward, 5'-GCG GAT CCG AAT GGG GAT ATT AAA TAT GTG-3' (*Bam*HI cloning site is underlined) and reverse, 5'-GGG GTA CCG TGG CAG GAG GCA GTG GGC AG-3' (*Kpn*I cloning site is underlined).

A similar PCR-based approach using rat genomic DNA was used to isolate the -508- to +5-bp of the rat *Insl3* promoter along with the following primers: forward, 5'-CTG GAT CCG GGC AGA GGC AGT GC-3' (*Bam*HI cloning site is underlined) and reverse, 5'-GGG GTA CCC GGA GGC AGC GGG TAA GGA C-3' (*Kpn*I cloning site is underlined). All reporter constructs were subcloned in a modified pXP1 Luciferase reporter construct (30) and subsequently verified by sequencing (Centre de Génomique de Québec, Centre Hospitalier Universitaire of Québec Research Centre, Québec City, Canada).

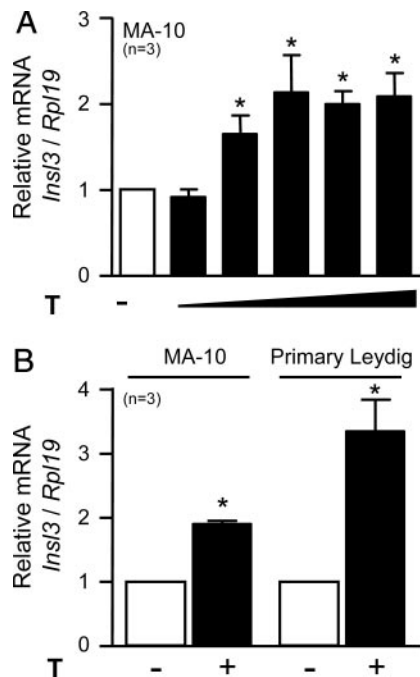

FIG. 1. Testosterone stimulates *Insl3* expression in Leydig cells. A, MA-10 Leydig cells were treated with either 1500 nM dimethylsulfoxide (open bar) or increasing doses of testosterone (T) (black triangle): 0.15, 1.5, 15, 150, and 1500 nM for 36 h. B, MA-10 and primary cultures of Leydig cells from rats were treated with 15 nM dimethylsulfoxide (open bars) or testosterone (T) (black bars) for 36 h. Total RNA was next isolated and used in quantitative real-time PCR using primers specific for *Insl3* cDNA as described in *Materials and Methods*. Results were corrected with the *Rpl19* cDNA. Results are the mean of three individual experiments performed in duplicate ( $\pm$ SEM). \*, Statistically significant difference from control.

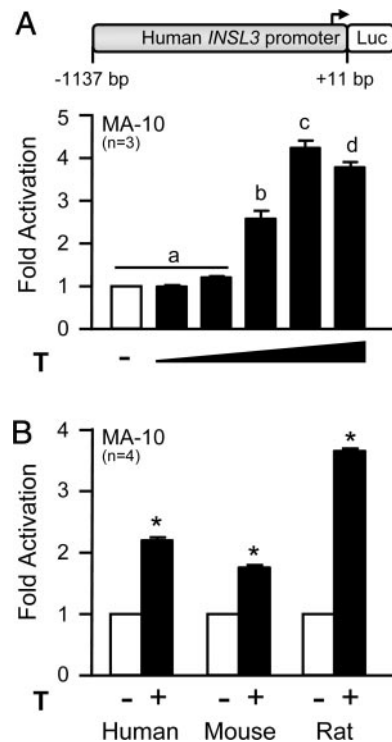

FIG. 2. The *INSL3* promoter from different species is activated by testosterone. A, MA-10 cells were transfected with a -1137 bp human *INSL3* promoter construct and treated with either 1500 nM dimethylsulfoxide (open bar) or increasing doses of testosterone (T) (black triangle: 0.15, 1.5, 15, 150, and 1500 nM) for 36 h. A different letter indicates a statistically significant difference. B, MA-10 cells were transfected with a -1137- to +11-bp human *INSL3* promoter, -978- to +5-bp mouse *Insl3* promoter, and -508- to +5-bp rat *Insl3* promoter and treated with 15 nM dimethylsulfoxide (open bars) or testosterone (T) (black bars) for 36 h. \*, Statistically significant difference from the respective control. Results are shown as fold activation over control ( $\pm$ SEM).

FIG. 3. Testosterone-dependent activation of *Insl3* transcription requires the androgen receptor. A, MA-10 Leydig cells were transfected with a –1137-bp human *INSL3* promoter construct and pretreated with 50  $\mu$ M dimethylsulfoxide (open bars) or increasing doses of hydroxyflutamide (HF) (black triangle: 50 nM, 250 nM, 500 nM, 5  $\mu$ M, 25  $\mu$ M, and 50  $\mu$ M) for 1 h followed by addition of vehicle (–) or 15 nM testosterone (T, +) for 36 h. \*, Statistically significant difference from the respective control. Results are shown as fold activation over control (SEM). B, MA-10 cells were treated with either dimethylsulfoxide (open bar), 15 nM testosterone (T) (black bar), 5  $\mu$ M hydroxyflutamide (HF) (gray bar), or a combination of hydroxyflutamide and testosterone (hatched bar). Total RNA was isolated and *Insl3* expression was determined by quantitative real-time PCR. Results were corrected with the *Rpl19* cDNA. Results are the mean of three individual experiments performed in duplicate ( $\pm$ SEM). \*, Statistically significant difference from control.

### Cell culture and transfections

The mouse Leydig cell line MA-10 (31) was provided by Dr. Mario Ascoli (University of Iowa, Iowa City, IA). Cells were grown in Waymouth's media supplemented with 12% horse serum and 50 mg/liter of gentamicin and streptomycin sulfate, at 37 C in 5% CO<sub>2</sub>. Cells were plated in a 24-well plate at a density of 90,000 cells/well in Waymouth's supplemented with 12% charcoal-treated horse serum and allowed to recover for 16–24 h before transfection. An amount of 0.2 picomoles of *Insl3* Firefly luciferase reporter construct along with 8 ng of phRL-TK Renilla luciferase reporter, used as internal control for transfection efficiency, were transfected using Lipofectamine 2000 reagent (Invitrogen Canada, Burlington, Ontario, Canada) according to the manufacturer's recommendations. Four hours later, media were replaced and cells were treated with either testosterone (concentrations indicated in the figure legends) with or without 30  $\mu$ M di-2-ethylhexyl phthalate (DEHP) or MEHP (TCI America, Portland, OR) for 24–36 h. Cells were then lysed and luciferase activities measured using the dual-luciferase assay system (Promega Corp., Madison, WI) and the EG&G Berthold LB 9507 luminometer (Berthold Technologies, Oak Ridge, TN). Transfections were performed at least three times in duplicate using different preparations of plasmid DNA.

### Isolation of primary Leydig cells

Primary Leydig cells were isolated as described previously (32) from 35-d-old Sprague Dawley rats obtained on site. Serum-free medium 199 with Earle's salts (Sigma-Aldrich Canada, Oakville, Ontario, Canada), L-glutamine, 1.5 mM HEPES, 2.5 g/liter NaHCO<sub>3</sub>, and antibiotics (50 U/ml penicillin and 50  $\mu$ g/ml streptomycin) was used during preparation and culturing. After 2 d in culture, the purity of the Leydig cell preparation was evaluated to be about 95% enriched as assessed by histochemical staining for 3 $\beta$ -hydroxysteroid dehydrogenase activity (33). All experiments were conducted according to the Canadian Council for Animal Care and have been approved by the Animal Care and Ethics Committee of Laval University (protocol 2005-184).

### RNA isolation, reverse transcription, and quantitative real-time PCR

Total RNA was isolated using the RNeasy Plus minikit (QIAGEN Canada, Mississauga, Ontario, Canada). First-strand cDNAs were synthesized from a 5- $\mu$ g aliquot of the various RNAs using the Superscript III reverse transcriptase system (Invitrogen Canada). Quantitative real-time PCR for *Insl3* and *Rpl19* were performed as previously described (15, 34). Each amplification was performed in duplicate using at least three different preparations of cDNAs for each of the three different RNA extractions.

### Statistical analysis

Statistical analyses were done using one-way ANOVA or ANOVA on ranks (when parameters were not met) followed by a Student-Newman-Keuls posttest. For all statistical analyses,  $P < 0.05$  was considered

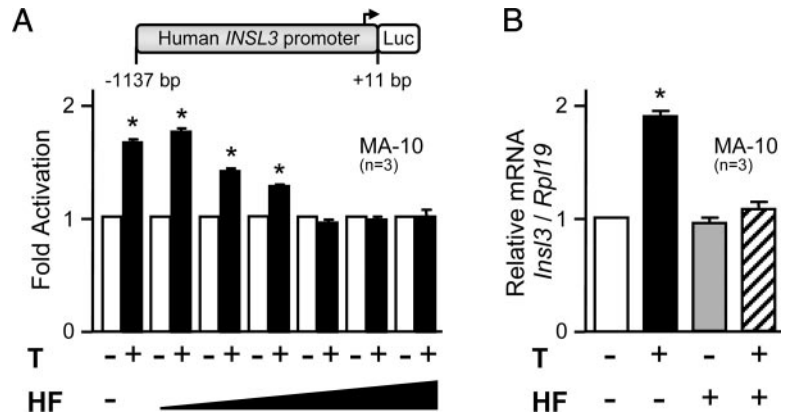

significant. All statistical analyses were done using the SigmaStat software package (Systat Software Inc., San Jose, CA).

## Results

### Testosterone increases *Insl3* mRNA levels in Leydig cells

To assess whether androgens could regulate *Insl3* expression, we first treated MA-10 cells, a Leydig cell line known to express AR (35), with increasing doses of testosterone, doses that are within the physiological range found within the rodent testis (200–350 nM) (36, 37). As shown in Fig. 1A, *Insl3* mRNA levels were significantly increased in response to testosterone as determined by quantitative real-time PCR. An even stronger response was observed when primary Leydig cell cultures were used (Fig. 1B). These results indicate that *Insl3* expression is regulated by androgens in Leydig cells and that the MA-10 Leydig cell line constitutes an appropriate model to study the underlying mechanisms of androgen action.

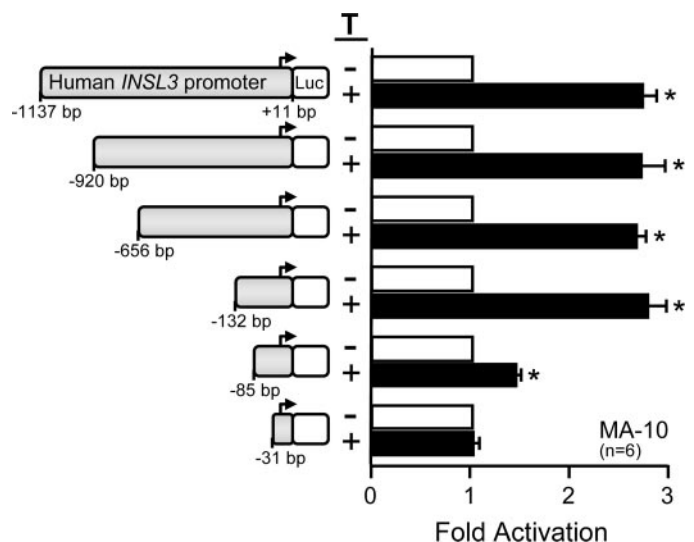

FIG. 4. The testosterone-responsive area is located in the proximal *INSL3* promoter. MA-10 cells were transfected with various 5' deletion constructs of the human *INSL3* promoter (the 5' end point of each construct is indicated on the left of the graph) and treated with dimethylsulfoxide (open bars) or 15 nM testosterone (T) (black bars). \*, Statistically significant difference from the respective control.

### Testosterone stimulates *Insl3* promoter activity from different species

Next, we ought to determine whether the effects of testosterone could be due to an increase in *Insl3* gene transcription. As shown in Fig. 2A, treatment of MA-10 Leydig cells with increasing doses of testosterone led to a dose-dependent activation of a –1137-bp human *INSL3* reporter construct. Similar results were obtained with the rat and mouse *Insl3* promoters (Fig. 2B). Thus, testosterone can activate the *Insl3* promoter from different species.

### Testosterone acts in an AR-dependent manner to increase in *Insl3* transcription

Although testosterone is known to act mainly through AR, some AR-independent responses to androgens have been reported (reviewed in Ref. 38). The involvement of AR in testosterone-induced *Insl3* transcription was assessed by treating MA-10 Leydig cells with testosterone in the presence or absence of hydroxyflutamide, the biologically active form of flutamide and a potent AR antagonist. Testosterone-mediated increase in *INSL3* promoter activity (Fig. 3A) and endogenous mRNA levels (Fig. 3B) were abolished in the presence of the antagonist. The AR antagonist had no effect when used alone (Fig. 3). All together, these results establish the requirement of AR for testosterone-dependent stimulation of *Insl3* transcription.

### Mapping of the testosterone-responsive element in the *INSL3* promoter

To locate the testosterone-responsive element in the human *INSL3* promoter, a series of 5' progressive deletion constructs were generated and transfected in MA-10 Leydig cells that were then treated with 15 nM testosterone. As shown in Fig. 4, deletion from –1137 to –132 bp had no effect on testosterone responsiveness (nearly 3-fold). Further deletion to –85 bp severely blunted the testosterone-responsiveness of the *INSL3* promoter to 1.4-fold. The testosterone-activating effects were specific because a –31-bp minimal *INSL3* promoter construct was no longer responsive (Fig. 4). These data indicate that the main testosterone-responsive element(s) are located between –132 and –85 bp. A survey of the 47-bp promoter sequence between –132 and –85 bp did not reveal the presence of a consensus androgen response element (GGTACAnnnTGTCT). The 47-bp region, however, contains a half-site for the binding of nuclear receptors (AGGTCA), which we previously described as a binding site for the nuclear receptors NUR77 and SF1 (15, 16). To better define the element within the 47-bp region, a series of mutant constructs were generated in the context of the –1137-bp (Fig. 5A) and the –132-bp (Fig. 5B) *INSL3* promoter. In the context of the –1137-bp promoter construct, mutations M1–M3 had no impact on the testosterone-responsiveness of the *INSL3* promoter, whereas mutations M4–M7 caused a

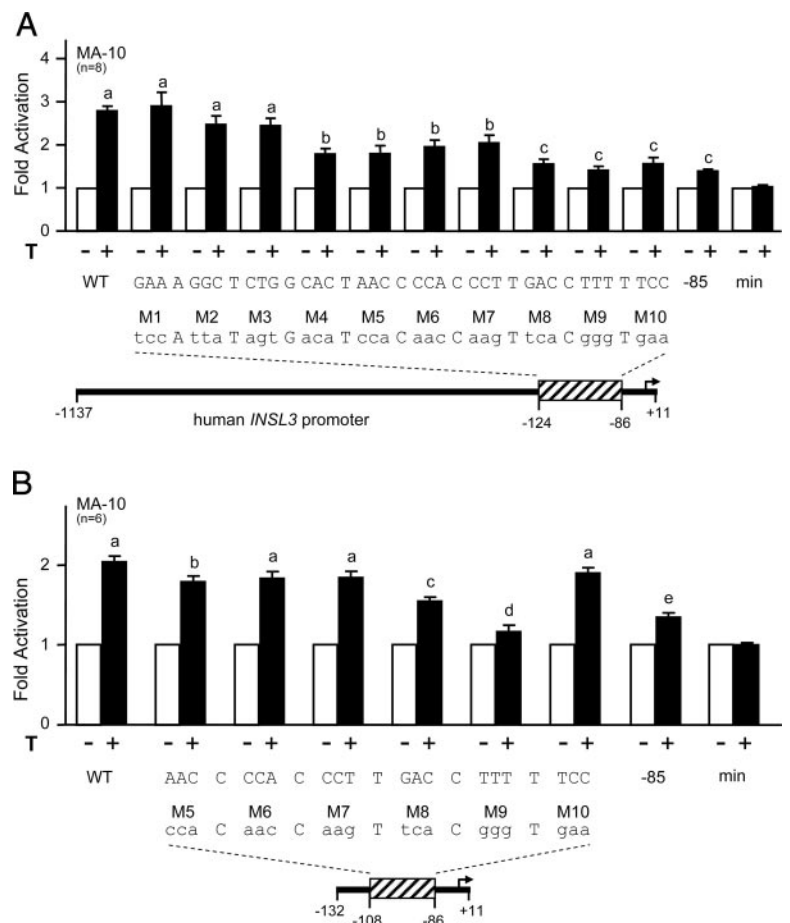

FIG. 5. Fine mapping of the testosterone-responsive element in the human *INSL3* promoter. MA-10 Leydig cells were transfected with either a wild-type (WT) or a series of human *INSL3* promoter constructs containing trinucleotide mutations in the testosterone-responsive region either in the context of the –1137-bp (A) or –132-bp (B) reporter. The wild-type *INSL3* promoter sequence is shown on top and the corresponding mutated nucleotides are shown underneath in lowercase. MA-10 cells were treated with either dimethylsulfoxide (open bars) or 15 nM testosterone (T) (black bars). A different letter indicates a statistically significant difference. Results are shown as fold activation over control ( $\pm$ SEM).

small but significant reduction in the testosterone-dependent activation (Fig. 5A). Mutations M8, M9, and M10, sequentially changing each of the *underlined* triplet in the sequence GACCTTTTCC, had the most dramatic effects, decreasing testosterone responsiveness to the level observed with the –85-bp construct (from nearly 3-fold to 1.4-fold) (Fig. 5A). Interestingly, this sequence contains the NUR77/SF1 nuclear receptor binding site. Similar results were obtained in the context of the –132-bp reporter construct with mutation M9 eliminating the testosterone-responsiveness of the *INSL3* promoter (Fig. 5B).

#### MEHP antagonizes testosterone-induced *Insl3* expression

MEHP, the active metabolite of a widely used plasticizer, is known to repress *Insl3* expression *in vivo* in Leydig cells (29). Although the exact molecular mechanisms remain unidentified, it is known that MEHP cannot bind to AR but nonetheless acts as an antiandrogen (39–41). Because we have shown that androgens activate *Insl3* transcription, we tested whether MEHP could modulate testosterone action on *Insl3* transcription. As shown in Fig. 6, 30  $\mu\text{M}$  of MEHP significantly inhibited the testosterone-mediated increase in *Insl3* mRNA in primary Leydig cells but had no effect in unstimulated cells. Similarly, MEHP, but not its inactive precursor DEHP, significantly reduced the testosterone-dependent activation of the human *INSL3* promoter (Fig. 7). Thus, MEHP represses *Insl3* expression, at least in part, by antagonizing testosterone action.

### Discussion

INSL3, a small peptide of gonadal origin, plays important roles in reproductive function (42). In addition, its expression in males is highly correlated with the functional status of testicular Leydig cells and to circulating testosterone levels (17, 18, 43–45). In the present study, we found that androgens activate *Insl3* transcription in Leydig cells and that this is

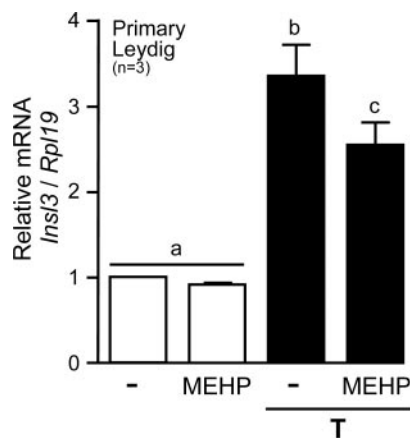

FIG. 6. MEHP inhibits the testosterone-induced *Insl3* expression. Rat primary Leydig cells were treated with vehicle or 30  $\mu\text{M}$  MEHP in the absence (open bars) or presence of 15 nM testosterone (T) (black bars) for 36 h. Total RNA was isolated and *Insl3* expression was determined by quantitative real-time PCR. Results were corrected with the *Rpl19* cDNA. Results are the mean of three individual experiments performed in duplicate ( $\pm$ SEM). A different letter indicates a statistically significant difference.

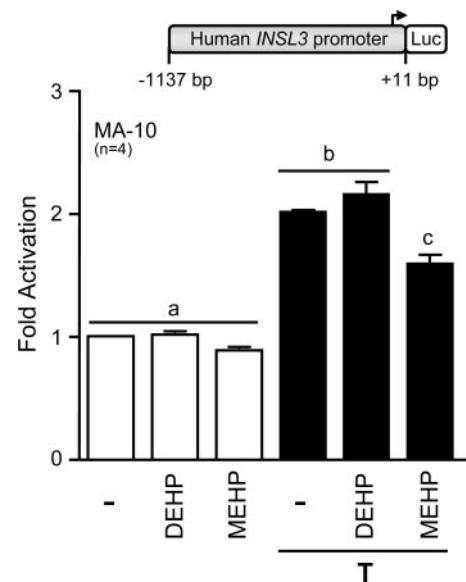

FIG. 7. Testosterone-mediated induction of *INSL3* promoter activity is repressed by MEHP. MA-10 Leydig cells were transfected with a –1137-bp human *INSL3* reporter construct and treated with vehicle or 30  $\mu\text{M}$  DEHP or MEHP in the absence (open bars) or presence of 15 nM testosterone (T) (black bars) for 36 h. A different letter indicates a statistically significant difference. Results are shown as fold activation over control ( $\pm$ SEM).

partly antagonized by MEHP, a widely distributed endocrine disruptor with antiandrogenic activity.

#### Expression of *Insl3* in Leydig cells

Although the *Insl3* gene is located within the last intron of the *Jak3* gene, the two genes have very divergent expression profile. *Jak3* is restricted to lymphoid and hematopoietic cells (46, 47), whereas *Insl3* is found exclusively in the gonads, mainly in testicular Leydig cells (1–4). *Jak3* and *Insl3* are therefore not likely to share regulatory elements despite their close genomic association. Because of this atypical organization, it is believed that the regulatory motifs driving *Insl3* expression in Leydig cells are located within a relatively short 5' flanking sequence. In agreement with this, the first 200 bp upstream of the transcription start site were found to be sufficient to confer activity to the mouse (12, 13), rat (14), and human (our data) *Insl3* promoter in MA-10 Leydig cells. Within this fragment are found binding sites for the transcription factors SF1 and NUR77 (12–16). Consistent with an *in vivo* role for SF1, *Insl3* expression was reduced in a Leydig cell-specific *Sf1* knockout mouse model (48).

#### Mechanism of androgen action on *Insl3* transcription

In addition to these two transcription factors, we found that testosterone also activates *Insl3* expression in a mouse Leydig cell line and primary Leydig cells from rats. These data are supported by evidence from the literature whereby modulation of androgen production or action in animal models was shown to cause a concomitant alteration in *Insl3* mRNA levels (3, 9, 17, 18, 22, 24, 49).

We found that testosterone directly regulates the activity of the *Insl3* promoter from various species. This indicates that

the mechanism of androgen action on *Insl3* expression has been evolutionarily conserved despite the poor sequence conservation between the human and rodent *Insl3* promoter. Testosterone action on *Insl3* transcription was found to be AR dependent. The AR-responsive region that we mapped in the human *INSL3* promoter, however, does not contain an androgen response element, suggesting that androgen-activated AR acts in a DNA binding-independent manner. AR has been shown to modulate gene expression and cell function without directly binding to DNA through nonclassical pathways (reviewed in Refs. 50 and 51).

#### Androgen-MEHP antagonism in *Insl3* transcription

Phthalates are chemicals used to impart flexibility and durability to polyvinyl chloride and comprise up to 40% of the plastic volume. Phthalates are ubiquitous contaminants of the environment and humans, and animals are inevitably exposed to these chemicals (52–58). The primary targets of phthalates are testicular Leydig cells (59).

In the present study, we found that MEHP, a biologically active phthalate with endocrine disrupting activity, partly inhibited testosterone action on *Insl3* expression in a Leydig cell line (MA-10) and primary cultures of rat Leydig cells. Our data confirm that MA-10 cells are an appropriate model to study phthalate-mediated effects, which is in agreement with a previous study by Dees *et al.* (60). It is known that *in utero* exposure to phthalates, including MEHP, causes several detrimental reproductive defects, including undescended testis, hypospadias, and decreased testosterone production, in males in various animal models (reviewed in Ref. 61). They are believed to have adverse effects on human reproductive health as well (reviewed in Ref. 62). Phthalate exposure results in decreased expression of *Insl3* and genes involved in testosterone biosynthesis in Leydig cells (reviewed in Refs. 63 and 64). Although phthalates have anti-androgenic effects, they cannot interact with AR (39–41). Phthalate repressive effects in Leydig cells are believed to be mediated, at least in part, through activation of the peroxisome proliferator-activated receptor (PPAR) (65, 66). In the testis of *PPARα*-deficient mice exposed to phthalates, expression of the peripheral-type benzodiazepine receptor, which is involved in cholesterol transport, was no longer repressed (67), and the overall testis structure was found to be predominantly normal (68). Activated PPAR can repress gene expression in a DNA-binding-independent manner through the recruitment of corepressors or by interfering with other DNA-associated transcription factors (65, 66). Recently phthalates were also reported to act by decreasing recruitment of the transcription factor CCAAT/enhancer-binding protein- $\beta$  to DNA but having no effect on SF1 (69). Although the exact mechanism remains to be identified, we found that the phthalate MEHP antagonizes AR action through a region of the *Insl3* promoter known to bind transcriptional activators, which suggests that disruption of transcription factor interactions might be involved.

#### Acknowledgments

We thank Dr. Mario Ascoli (University of Iowa, Iowa City, IA) for providing the MA-10 cell line. We are also indebted to Sylvain Gauthier,

Shankar Singh, and Robert Sullivan (Centre Hospitalier Universitaire de Québec Research Centre, Québec City, Canada) for providing hydroxyflutamide and testosterone. We also thank Stéphanie Fiola and Luc Martin for technical assistance.

Received March 5, 2008. Accepted May 12, 2008.

Address all correspondence and requests for reprints to: Dr. Jacques J. Tremblay, Reproduction, Perinatal, and Child Health, Centre Hospitalier Universitaire de Québec Research Centre, CHUL Room T1-49, 2705 Laurier Boulevard, Québec City, Québec, Canada G1V 4G2. E-mail: jacques-j.tremblay@crchul.ulaval.ca.

This work was supported by Canadian Institutes of Health Research (CIHR) Grant MOP-77575 (to J.J.T.). J.J.T. holds a New Investigator Scholarship from the CIHR.

Disclosure Statement: E.L. and J.J.T. have nothing to declare.

#### References

- Adham IM, Burkhardt E, Benahmed M, Engel W 1993 Cloning of a cDNA for a novel insulin-like peptide of the testicular Leydig cells. *J Biol Chem* 268:26668–26672
- Pusch W, Balvers M, Ivell R 1996 Molecular cloning and expression of the relaxin-like factor from the mouse testis. *Endocrinology* 137:3009–3013
- Balvers M, Spiess AN, Domagalski R, Hunt N, Kilic E, Mukhopadhyay AK, Hanks E, Charlton HM, Ivell R 1998 Relaxin-like factor expression as a marker of differentiation in the mouse testis and ovary. *Endocrinology* 139:2960–2970
- Zimmermann S, Schottler P, Engel W, Adham IM 1997 Mouse Leydig insulin-like (Ley I-L) gene: structure and expression during testis and ovary development. *Mol Reprod Dev* 47:30–38
- Nef S, Parada LF 1999 Cryptorchidism in mice mutant for *Insl3*. *Nat Genet* 22:295–299
- Zimmermann S, Steding G, Emmen JM, Brinkmann AO, Nayernia K, Holstein AF, Engel W, Adham IM 1999 Targeted disruption of the *Insl3* gene causes bilateral cryptorchidism. *Mol Endocrinol* 13:681–691
- Adham IM, Steding G, Thamm T, Bullesbach EE, Schwabe C, Paprotta I, Engel W 2002 The overexpression of the *insl3* in female mice causes descent of the ovaries. *Mol Endocrinol* 16:244–252
- Koskimies P, Suvanto M, Nokkala E, Huhtaniemi IT, McLuskey A, Themmen AP, Poutanen M 2003 Female mice carrying a ubiquitin promoter-*Insl3* transgene have descended ovaries and inguinal hernias but normal fertility. *Mol Cell Endocrinol* 206:159–166
- Kawamura K, Kumagai J, Sudo S, Chun SY, Pisarska M, Morita H, Toppari J, Fu P, Wade JD, Bathgate RA, Hsueh AJ 2004 Paracrine regulation of mammalian oocyte maturation and male germ cell survival. *Proc Natl Acad Sci USA* 101:7323–7328
- Irving-Rodgers HF, Bathgate RA, Ivell R, Domagalski R, Rodgers RJ 2002 Dynamic changes in the expression of relaxin-like factor (*INSL3*), cholesterol side-chain cleavage cytochrome p450, and  $\beta$ -hydroxysteroid dehydrogenase in bovine ovarian follicles during growth and atresia. *Biol Reprod* 66:934–943
- Spanel-Borowski K, Schafer I, Zimmermann S, Engel W, Adham IM 2001 Increase in final stages of follicular atresia and premature decay of corpora lutea in *Insl3*-deficient mice. *Mol Reprod Dev* 58:281–286
- Koskimies P, Levallet J, Sipila P, Huhtaniemi I, Poutanen M 2002 Murine relaxin-like factor promoter: functional characterization and regulation by transcription factors steroidogenic factor 1 and DAX-1. *Endocrinology* 143:909–919
- Zimmermann S, Schwarzler A, Buth S, Engel W, Adham IM 1998 Transcription of the Leydig insulin-like gene is mediated by steroidogenic factor-1. *Mol Endocrinol* 12:706–713
- Sadeghian H, Anand-Ivell R, Balvers M, Relan V, Ivell R 2005 Constitutive regulation of the *Insl3* gene in rat Leydig cells. *Mol Cell Endocrinol* 241:10–20
- Robert NM, Martin LJ, Tremblay JJ 2006 The orphan nuclear receptor NR4A1 regulates insulin-like 3 gene transcription in Leydig cells. *Biol Reprod* 74:322–330
- Tremblay JJ, Robert NM 2005 Role of nuclear receptors in *INSL3* gene transcription in Leydig cells. *Ann NY Acad Sci* 1061:183–189
- Foresta C, Bettella A, Vinanzi C, Dabrilli P, Merigliola MC, Garolla A, Ferlin A 2004 A novel circulating hormone of testis origin in humans. *J Clin Endocrinol Metab* 89:5952–5958
- Ferlin A, Garolla A, Rigon F, Rasi CL, Lenzi A, Foresta C 2006 Changes in serum insulin-like factor 3 during normal male puberty. *J Clin Endocrinol Metab* 91:3426–3431
- Charest NJ, Zhou ZX, Lubahn DB, Olsen KL, Wilson EM, French FS 1991 A frameshift mutation destabilizes androgen receptor messenger RNA in the Tfm mouse. *Mol Endocrinol* 5:573–581
- He WW, Kumar MV, Tindall DJ 1991 A frame-shift mutation in the androgen receptor gene causes complete androgen insensitivity in the testicular-feminized mouse. *Nucleic Acids Res* 19:2373–2378
- Yarbrough WG, Quarmby VE, Simental JA, Joseph DR, Sar M, Lubahn DB, Olsen KL, French FS, Wilson EM 1990 A single base mutation in the androgen

- receptor gene causes androgen insensitivity in the testicular feminized rat. *J Biol Chem* 265:8893–8900
22. O'Shaughnessy PJ, Johnston H, Willerton L, Baker PJ 2002 Failure of normal adult Leydig cell development in androgen-receptor-deficient mice. *J Cell Sci* 115:3491–3496
  23. Holdcraft RW, Braun RE 2004 Androgen receptor function is required in Sertoli cells for the terminal differentiation of haploid spermatids. *Development* 131:459–467
  24. Eacker SM, Shima JE, Connolly CM, Sharma M, Holdcraft RW, Griswold MD, Braun RE 2007 Transcriptional profiling of androgen receptor (AR) mutants suggests instructive and permissive roles of AR signaling in germ cell development. *Mol Endocrinol* 21:895–907
  25. Cattanch BM, Iddon CA, Charlton HM, Chiappa SA, Fink G 1977 Gonadotrophin-releasing hormone deficiency in a mutant mouse with hypogonadism. *Nature* 269:338–340
  26. Mason AJ, Hayflick JS, Zoeller RT, Young III WS, Phillips HS, Nikolics K, Seeburg PH 1986 A deletion truncating the gonadotropin-releasing hormone gene is responsible for hypogonadism in the hpg mouse. *Science* 234:1366–1371
  27. McKinnell C, Sharpe RM, Mahood K, Hallmark N, Scott H, Ivell R, Staub C, Jegou B, Haag F, Koch-Nolte F, Hartung S 2005 Expression of insulin-like factor 3 protein in the rat testis during fetal and postnatal development and in relation to cryptorchidism induced by *in utero* exposure to di(*n*-butyl)phthalate. *Endocrinology* 146:4536–4544
  28. Shono T, Shima Y, Kondo T, Suita S 2005 *In utero* exposure to mono-*n*-butyl phthalate impairs insulin-like factor 3 gene expression and the transabdominal phase of testicular descent in fetal rats. *J Pediatr Surg* 40:1861–1864
  29. Wilson VS, Lambright C, Furr J, Ostby J, Wood C, Held G, Gray Jr LE 2004 Phthalate ester-induced gubernacular lesions are associated with reduced *insl3* gene expression in the fetal rat testis. *Toxicol Lett* 146:207–215
  30. Tremblay JJ, Viger RS 1999 Transcription factor GATA-4 enhances Müllerian inhibiting substance gene transcription through a direct interaction with the nuclear receptor SF-1. *Mol Endocrinol* 13:1388–1401
  31. Ascoli M 1981 Characterization of several clonal lines of cultured Leydig tumor cells: gonadotropin receptors and steroidogenic responses. *Endocrinology* 108:88–95
  32. Khan S, Teerds K, Dorrington J 1992 Growth factor requirements for DNA synthesis by Leydig cells from the immature rat. *Biol Reprod* 46:335–341
  33. Klinefelter GR, Hall PF, Ewing LL 1987 Effect of luteinizing hormone deprivation *in situ* on steroidogenesis of rat Leydig cells purified by a multistep procedure. *Biol Reprod* 36:769–783
  34. Guigon CJ, Coudouel N, Mazaud-Guittot S, Forest MG, Magre S 2005 Follicular cells acquire Sertoli cell characteristics after oocyte loss. *Endocrinology* 146:2992–3004
  35. Houk CP, Pearson EJ, Martinelle N, Donahoe PK, Teixeira J 2004 Feedback inhibition of steroidogenic acute regulatory protein expression *in vitro* and *in vivo* by androgens. *Endocrinology* 145:1269–1275
  36. Comhaire FH, Vermeulen A 1976 Testosterone concentration in the fluids of seminiferous tubules, the interstitium and the rete testis of the rat. *J Endocrinol* 70:229–235
  37. Turner TT, Jones CE, Howards SS, Ewing LL, Zegeye B, Gunsalsu GL 1984 On the androgen microenvironment of maturing spermatozoa. *Endocrinology* 115:1925–1932
  38. Walker WH 2003 Nongenomic actions of androgen in Sertoli cells. *Curr Top Dev Biol* 56:25–53
  39. Borch J, Metzdorff SB, Vinggaard AM, Brokken L, Dalgaard M 2006 Mechanisms underlying the anti-androgenic effects of diethylhexyl phthalate in fetal rat testis. *Toxicology* 223:144–155
  40. Gray Jr LE, Wolf C, Lambright C, Mann P, Price M, Cooper RL, Ostby J 1999 Administration of potentially antiandrogenic pesticides (procymidone, linuron, iprodione, chlozolinate, p,p'-DDE, and ketoconazole) and toxic substances (dibutyl- and diethylhexyl phthalate, PCB 169, and ethane dimethane sulphate) during sexual differentiation produces diverse profiles of reproductive malformations in the male rat. *Toxicol Ind Health* 15:94–118
  41. Parks LG, Ostby JS, Lambright CR, Abbott BD, Klinefelter GR, Barlow NJ, Gray Jr LE 2000 The plasticizer diethylhexyl phthalate induces malformations by decreasing fetal testosterone synthesis during sexual differentiation in the male rat. *Toxicol Sci* 58:339–349
  42. Ferlin A, Arredi B, Zuccarello D, Garolla A, Selice R, Foresta C 2006 Paracrine and endocrine roles of insulin-like factor 3. *J Endocrinol Invest* 29:657–664
  43. Bay K, Hartung S, Ivell R, Schumacher M, Jurgensen D, Jorgensen N, Holm M, Skakkebaek NE, Andersson AM 2005 Insulin-like factor 3 serum levels in 135 normal men and 85 men with testicular disorders: relationship to the luteinizing hormone-testosterone axis. *J Clin Endocrinol Metab* 90:3410–3418
  44. Ivell R, Hartung S, Anand-Ivell R 2005 Insulin-like factor 3: where are we now? *Ann NY Acad Sci* 1041:486–496
  45. Wikström AM, Bay K, Hero M, Andersson AM, Dunkel L 2006 Serum insulin-like factor 3 levels during puberty in healthy boys and boys with Klinefelter syndrome. *J Clin Endocrinol Metab* 91:4705–4708
  46. Gurniak CB, Berg LJ 1996 Murine JAK3 is preferentially expressed in hematopoietic tissues and lymphocyte precursor cells. *Blood* 87:3151–3160
  47. Kawamura M, McVicar DW, Johnston JA, Blake TB, Chen YQ, Lal BK, Lloyd AR, Kelvin DJ, Staples JE, Ortaldo JR 1994 Molecular cloning of L-JAK, a Janus family protein-tyrosine kinase expressed in natural killer cells and activated leukocytes. *Proc Natl Acad Sci USA* 91:6374–6378
  48. Jeyasuria P, Ikeda Y, Jamin SP, Zhao L, de Rooij DG, Themmen AP, Behringer RR, Parker KL 2004 Cell-specific knockout of steroidogenic factor 1 reveals its essential roles in gonadal function. *Mol Endocrinol* 18:1610–1619
  49. De RG, Aniello F, Branno M, Izzo G, Minucci S 2006 The expression level of frog relaxin mRNA (*frlx*), in the testis of *Rana esculenta*, is influenced by testosterone. *J Exp Biol* 209:3806–3811
  50. Hammes SR, Levin ER 2007 Extranuclear steroid receptors: nature and actions. *Endocr Rev* 28:726–741
  51. Rahman F, Christian HC 2007 Non-classical actions of testosterone: an update. *Trends Endocrinol Metab* 18:371–378
  52. Sathyanarayana S 2008 Phthalates and children's health. *Curr Probl Pediatr Adolesc Health Care* 38:34–49
  53. Gaudin R, Marsan P, Robert A, Ducos P, Pruvost A, Levi M, Bouscaillou P 2008 Biological monitoring of occupational exposure to di(2-ethylhexyl) phthalate: survey of workers exposed to plastisols. *Int Arch Occup Environ Health* 81:959–966
  54. Frederiksen H, Skakkebaek NE, Andersson AM 2007 Metabolism of phthalates in humans. *Mol Nutr Food Res* 51:899–911
  55. Wittassek M, Wiesmuller GA, Koch HM, Eckard R, Dobler L, Muller J, Angerer J, Schluter C 2007 Internal phthalate exposure over the last two decades—a retrospective human biomonitoring study. *Int J Hyg Environ Health* 210:319–333
  56. Pak VM, McCauley LA 2007 Risks of phthalate exposure among the general population: implications for occupational health nurses. *AAOHN J* 55:12–17
  57. Pan G, Hanaoka T, Yoshimura M, Zhang S, Wang P, Tsukino H, Inoue K, Nakazawa H, Tsugane S, Takahashi K 2006 Decreased serum free testosterone in workers exposed to high levels of di-*n*-butyl phthalate (DBP) and di-2-ethylhexyl phthalate (DEHP): a cross-sectional study in China. *Environ Health Perspect* 114:1643–1648
  58. Hauser R, Calafat AM 2005 Phthalates and human health. *Occup Environ Med* 62:806–818
  59. Ge RS, Chen GR, Tanrikut C, Hardy MP 2007 Phthalate ester toxicity in Leydig cells: developmental timing and dosage considerations. *Reprod Toxicol* 23:366–373
  60. Dees JH, Gazouli M, Papadopoulos V 2001 Effect of mono-ethylhexyl phthalate on MA-10 Leydig tumor cells. *Reprod Toxicol* 15:171–187
  61. Fisher JS 2004 Environmental anti-androgens and male reproductive health: focus on phthalates and testicular dysgenesis syndrome. *Reproduction* 127:305–315
  62. Matsumoto M, Hirata-Koizumi M, Ema M 2008 Potential adverse effects of phthalic acid esters on human health: a review of recent studies on reproduction. *Regul Toxicol Pharmacol* 50:37–49
  63. Foster PM 2006 Disruption of reproductive development in male rat offspring following *in utero* exposure to phthalate esters. *Int J Androl* 29:140–147
  64. David RM 2006 Proposed mode of action for *in utero* effects of some phthalate esters on the developing male reproductive tract. *Toxicol Pathol* 34:209–219
  65. Corton JC, Lapinskas PJ 2005 Peroxisome proliferator-activated receptors: mediators of phthalate ester-induced effects in the male reproductive tract? *Toxicol Sci* 83:4–17
  66. Latini G, Scoditti E, Verrotti A, De FC, Massaro M 2008 Peroxisome proliferator-activated receptors as mediators of phthalate-induced effects in the male and female reproductive tract: epidemiological and experimental evidence. *PPAR Res* 2008:359267
  67. Gazouli M, Yao ZX, Boujrad N, Corton JC, Culty M, Papadopoulos V 2002 Effect of peroxisome proliferators on Leydig cell peripheral-type benzodiazepine receptor gene expression, hormone-stimulated cholesterol transport, and steroidogenesis: role of the peroxisome proliferator-activator receptor  $\alpha$ . *Endocrinology* 143:2571–2583
  68. Ward JM, Peters JM, Perella CM, Gonzalez FJ 1998 Receptor and nonreceptor-mediated organ-specific toxicity of di(2-ethylhexyl)phthalate (DEHP) in peroxisome proliferator-activated receptor  $\alpha$ -null mice. *Toxicol Pathol* 26:240–246
  69. Kuhl AJ, Ross SM, Gaido KW 2007 CCAAT/enhancer binding protein  $\beta$ , but not steroidogenic factor-1, modulates the phthalate-induced dysregulation of rat fetal testicular steroidogenesis. *Endocrinology* 148:5851–5864
